# Supplementary material for: Phenothiazine and semi-cyanine based colorimetric and fluorescent probes for detection of sulfites in solutions and in living cells
Source: Royal Society of Chemistry journal article supplement (doi:10.1039/d1ra06868g), 2021-01-01

Electronic Supplementary Information for

## Phenothiazine and semi-cyanine based colorimetric and fluorescent probes for detection of sulfites in solutions and in living cells

Hong-Wei Chen, Hong-Cheng Xia\*, O. A. Hakeim, Qin-Hua Song\*

*Department of Chemistry, University of Science and Technology of China, Hefei 230026, China.*

### Table of Contents

#### Table of Contents

|                                                                                       |        |
|---------------------------------------------------------------------------------------|--------|
| I. Photophysical and sensing properties of four probes .....                          | S2     |
| II. Spectral response of probes to $\text{HSO}_3^-/\text{SO}_3^{2-}$ .....            | S2     |
| III Mass spectra of PI-CN without and with $\text{NaHSO}_3$ .....                     | S3     |
| IV. Measurement of detection limits .....                                             | S4     |
| V. pH effects on optical response of PI-CN to $\text{HSO}_3^-/\text{SO}_3^{2-}$ ..... | S5     |
| VI. NMR spectra of related compounds .....                                            | S6-S11 |

---

\* Corresponding author. E-mail address: qhsong@ustc.edu (Q.-H. Song)

\* Corresponding author. E-mail address: xiahc@mail.ustc.edu.cn (H.-C. Xia)

## I. Photophysical and sensing properties of four probes

Table S1. Photophysical and sensing properties of four probes

| probe | $\lambda_{\text{abs}}(\epsilon)^a$<br>/nm | $(\epsilon)/(\text{L}\cdot\text{mol}^{-1}\cdot\text{cm}^{-1})^a$ | $\lambda_{\text{em}}^b$<br>/nm | LOD   |
|-------|-------------------------------------------|------------------------------------------------------------------|--------------------------------|-------|
| PI-CN | 518                                       | 30320                                                            | 499                            | 22 nM |
| PI-Br | 537                                       | 28320                                                            | 452                            | 28 nM |
| PI-H  | 545                                       | 29180                                                            | 455                            | 27 nM |
| PI-OH | 568                                       | 25846                                                            | 470                            | 37 nM |

<sup>a</sup> absorption maxima (nm) and molar absorption coefficients

<sup>b</sup> emission maxima (nm)

## II. Spectral response of probes to $\text{HSO}_3^-/\text{SO}_3^{2-}$

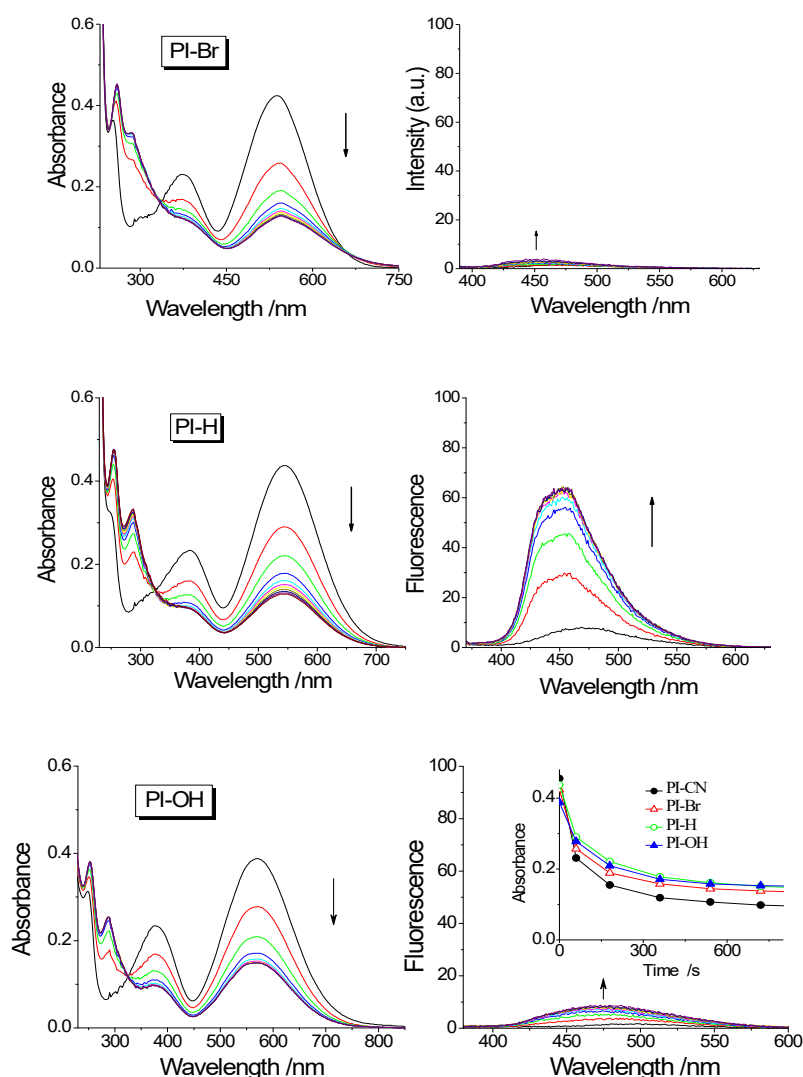

**Fig. S1** Time-dependent UV/vis absorption (left) and fluorescence spectra (right) of probes (15  $\mu\text{M}$ ) in EtOH/PBS (v/v1:3, pH 7.4) in the presence of  $\text{HSO}_3^-$  (1.0 equiv.) recorded at 0-30 min, excitation at 320 nm. Inset of PI-OH: plots of absorption maxima of probes vs time in the presence of  $\text{HSO}_3^-$  incubation for 15 min

### III. Mass spectra of PI-CN without and with NaHSO<sub>3</sub>

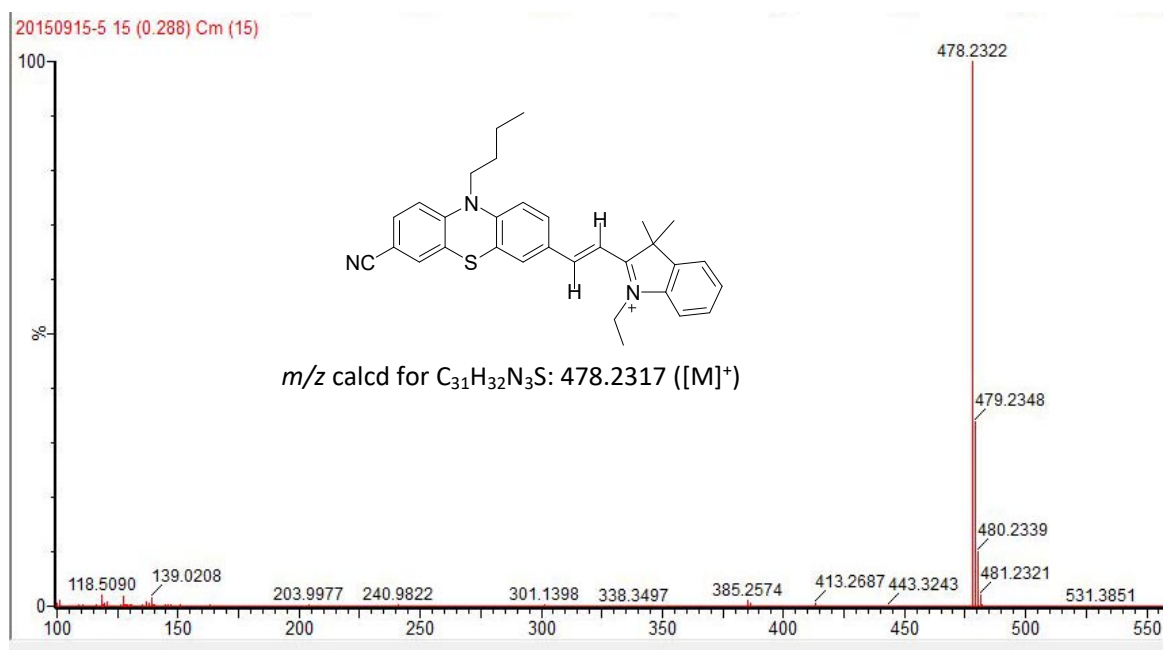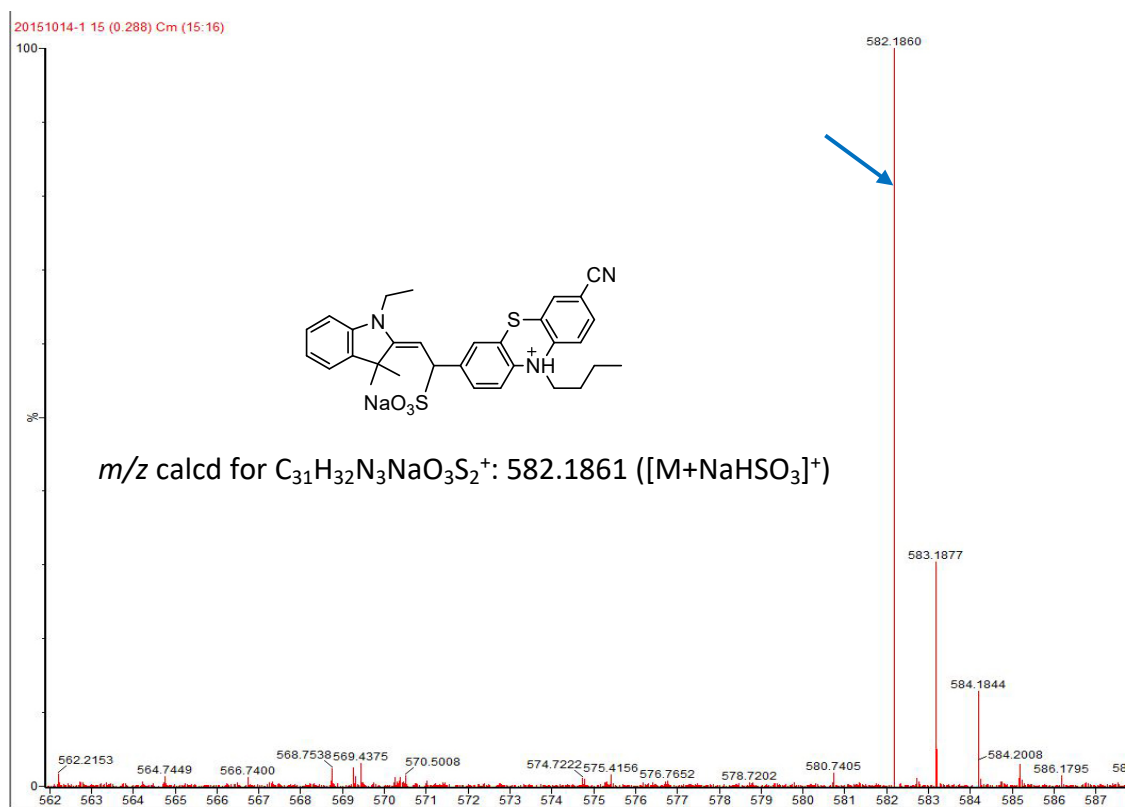

**Fig. S2** High-resolution MS of probe PI-CN (upper) and the mixture of PI-CN+NaHSO<sub>3</sub> (bottom).

## IV. Measurements of detection limits

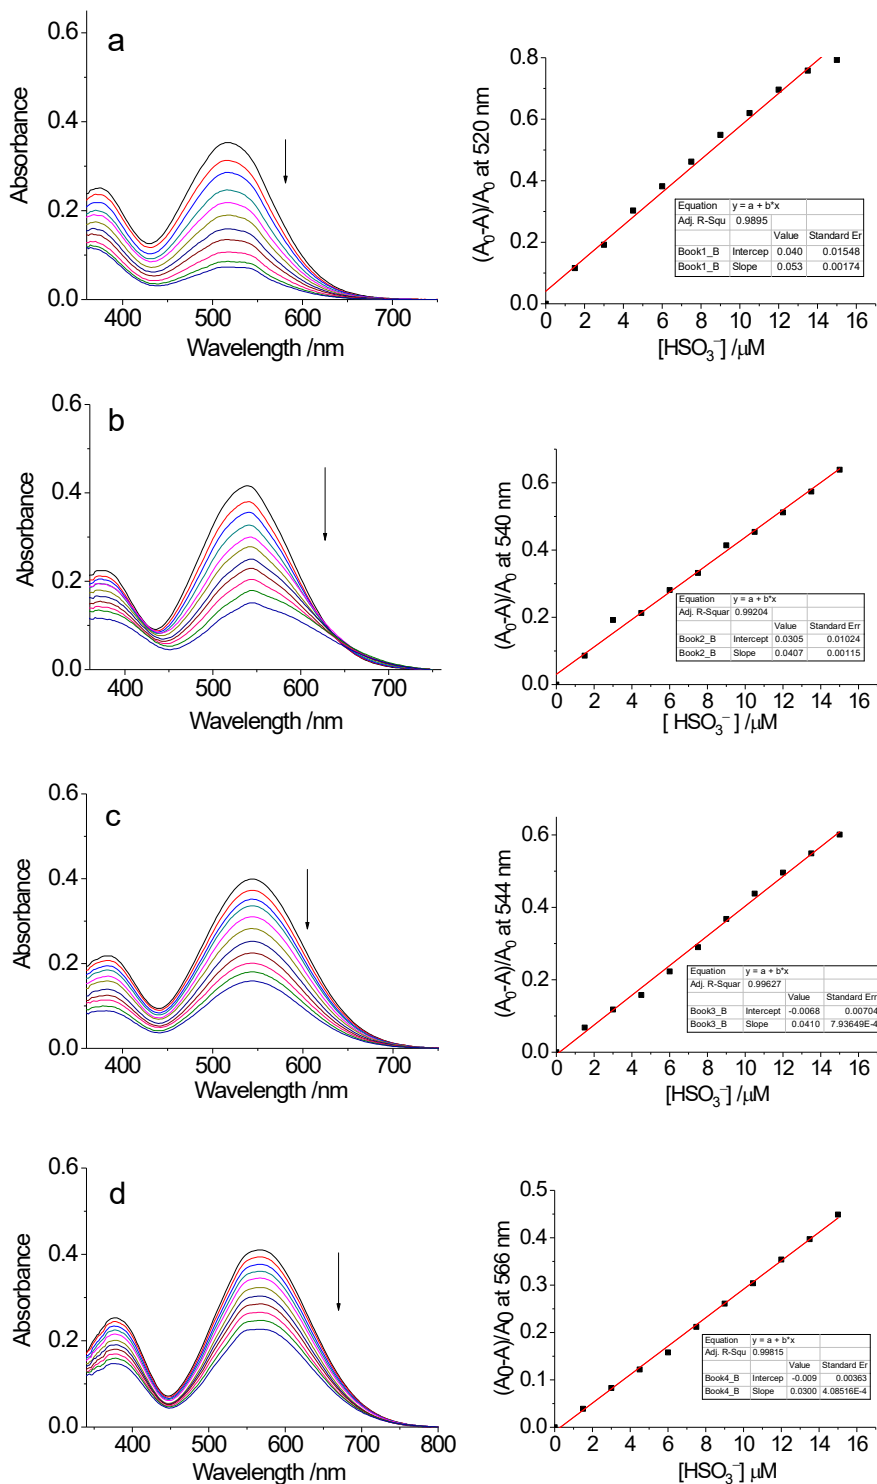

**Figure S3.** UV/vis absorption PI-CN (a), PI-Br (b), PI-H (c) and PI-OH (d) in EtOH/PBS (v/v1:3, pH 7.4) with titration of various amounts of  $\text{HSO}_3^-$  (0–15  $\mu\text{M}$ ), and the corresponding linear correlation between the absorbance toward concentrations of  $\text{HSO}_3^-$ .

V. pH effects on optical response of PI-CN to  $\text{HSO}_3^-/\text{SO}_3^{2-}$

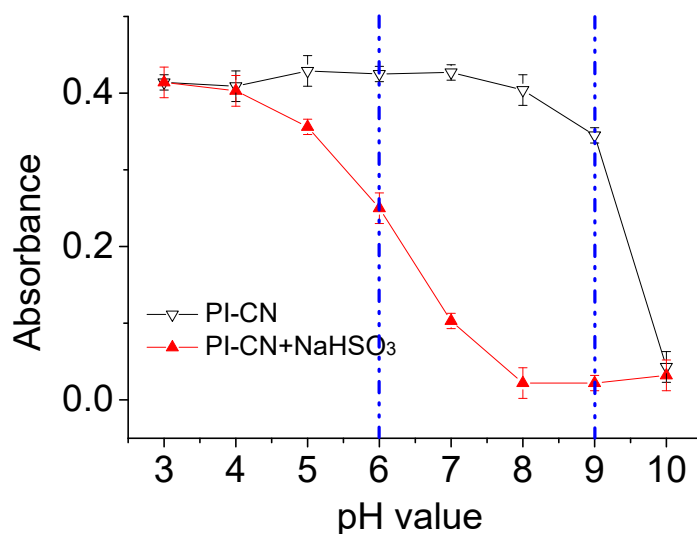

**Figure S4a.** Plots of absorbance at 520 nm to pH values for 15 $\mu\text{M}$  PI-CN solutions (EtOH/PBS v/v 1:3) before (black) and after (red) the addition of 15  $\mu\text{M}$   $\text{HSO}_3^-$ .

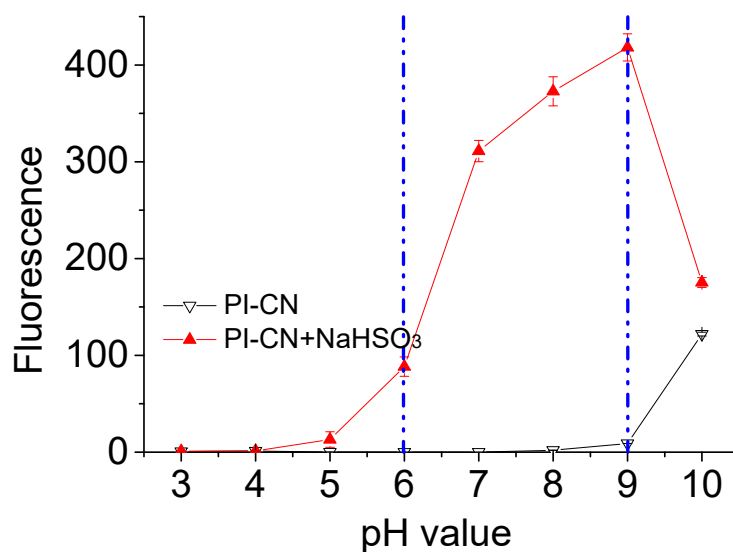

**Figure S4b.** Plots of fluorescence intensity at 499 nm to pH values for 15 $\mu\text{M}$  PI-CN solutions (EtOH/PBS v/v 1:3) before and after the addition of 15  $\mu\text{M}$   $\text{HSO}_3^-$ .

## IV. NMR spectra of related compounds

### $^1\text{H}$ NMR of compound **3**.

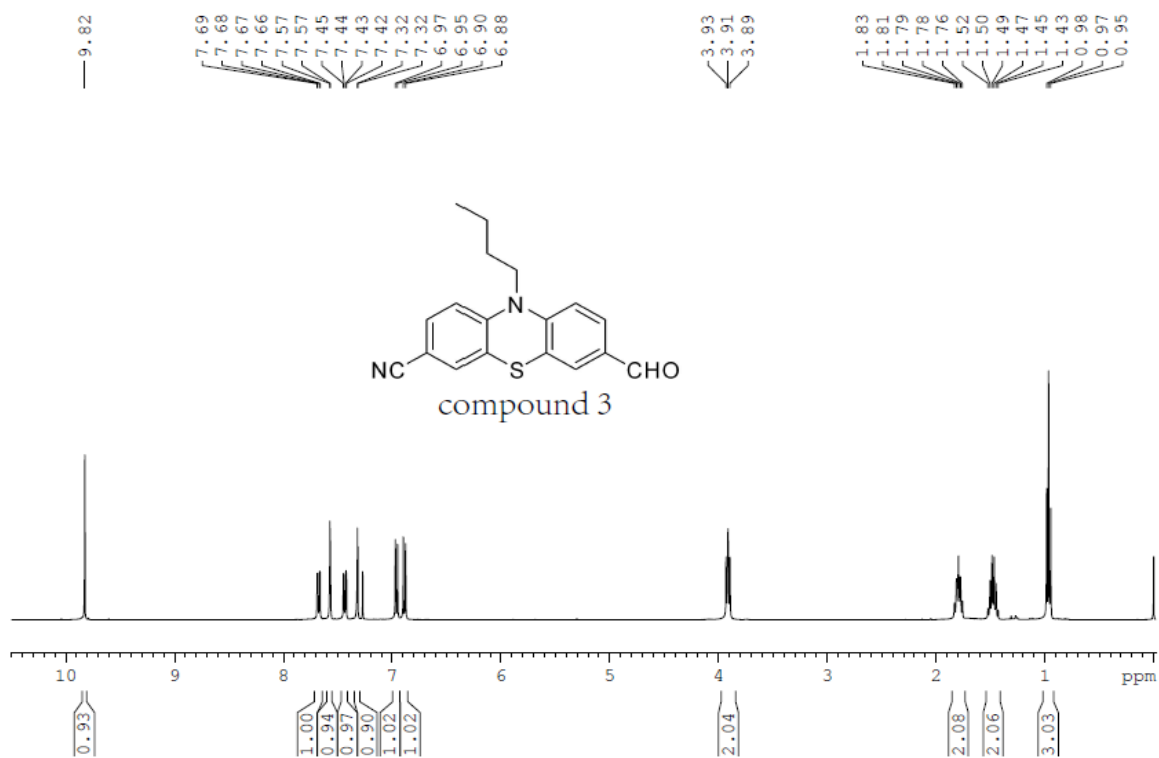

### $^{13}\text{C}$ NMR of compound **3**.

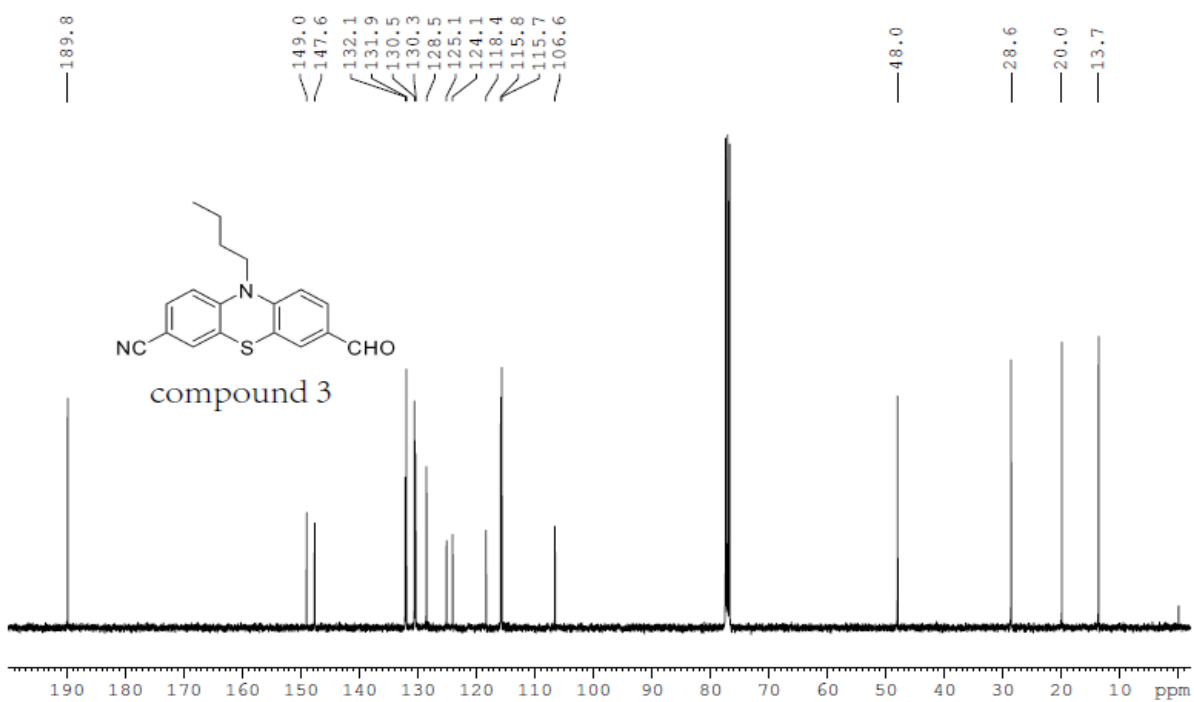

<sup>1</sup>H NMR of compound 4.

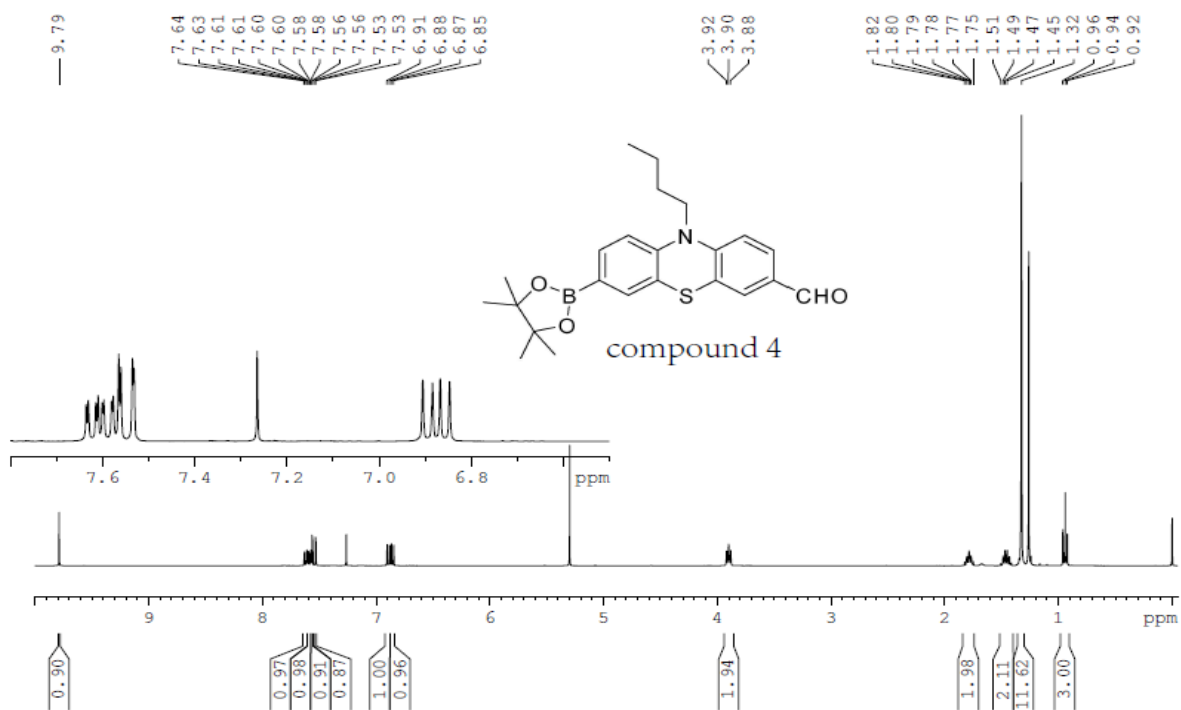

<sup>13</sup>C NMR of compound 4.

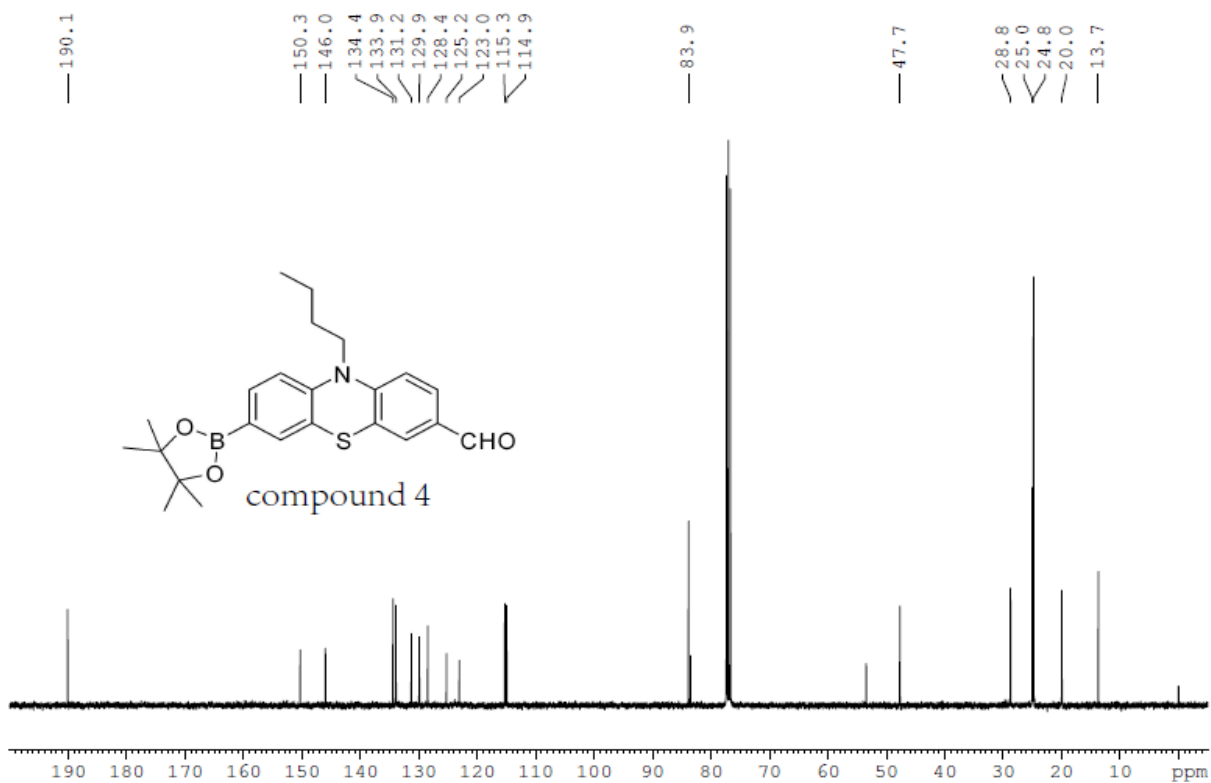

$^1\text{H}$  NMR of compound **5**.

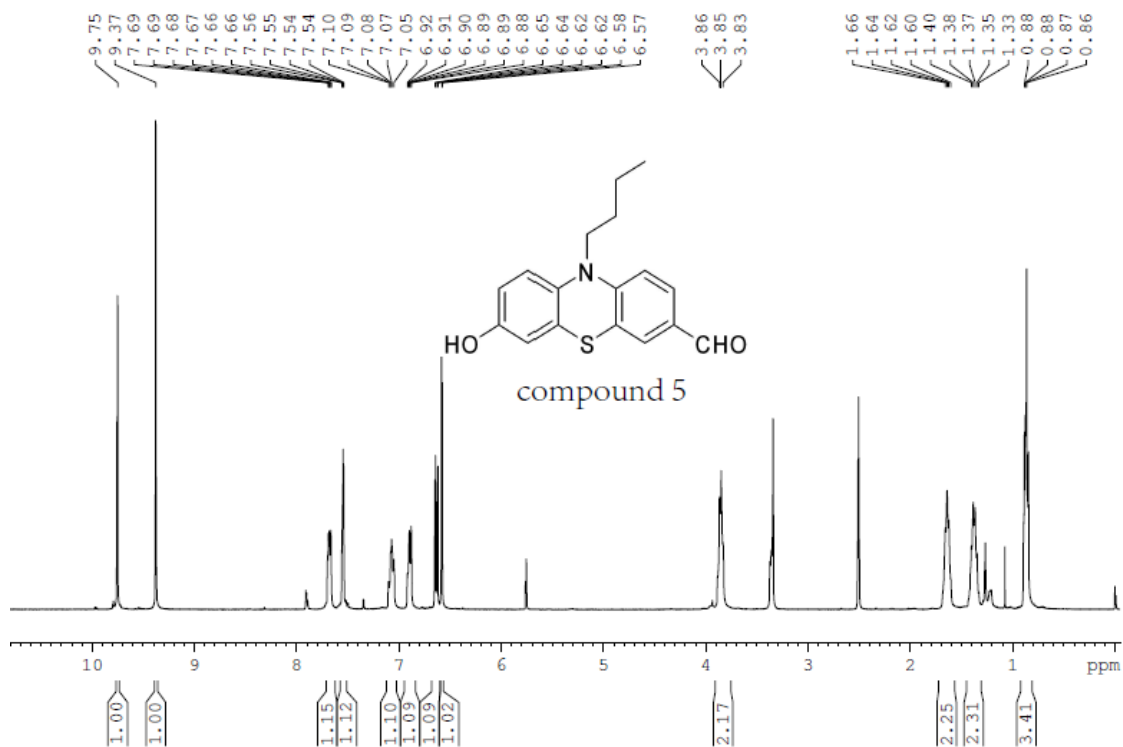

$^{13}\text{C}$  NMR of compound **5**.

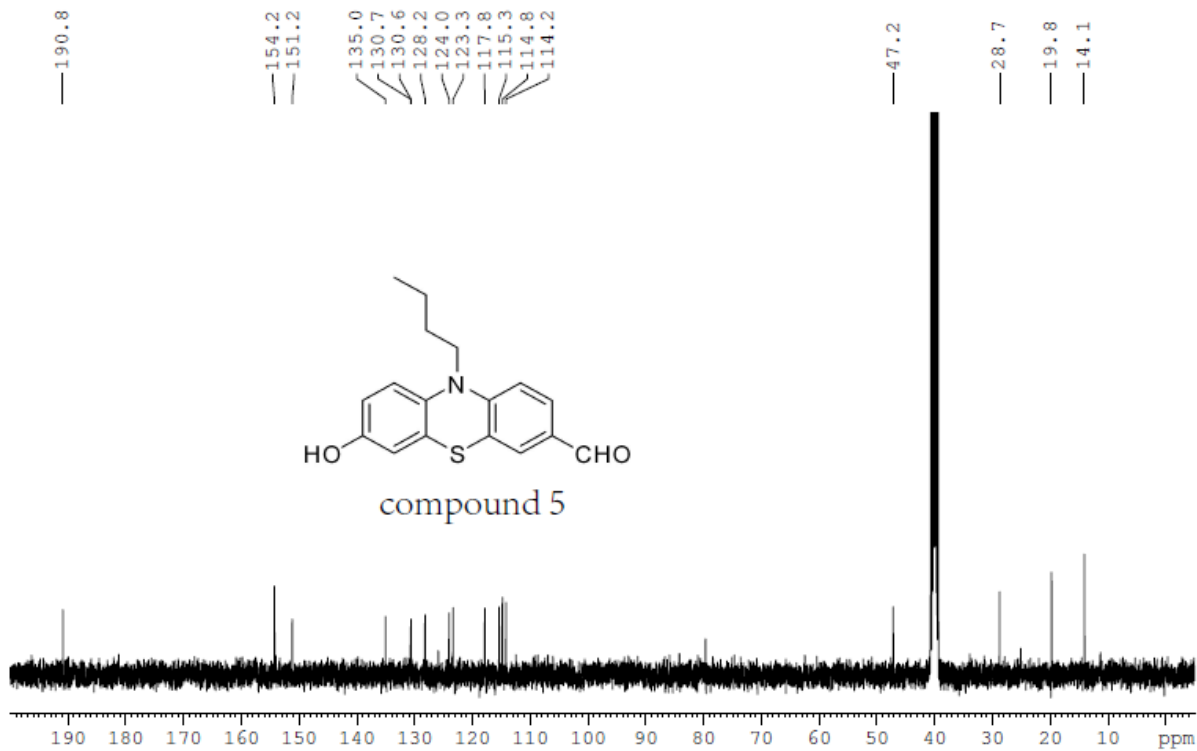



<sup>1</sup>H NMR of PI-CN.

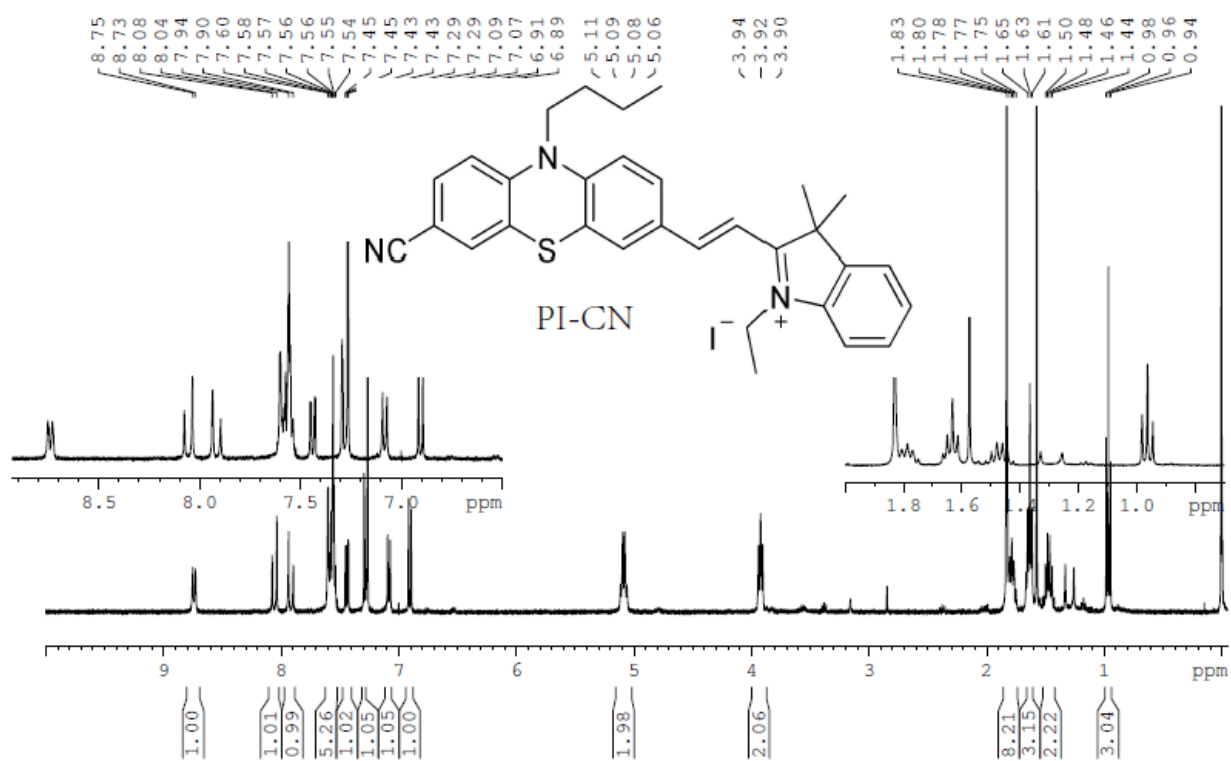

<sup>13</sup>C NMR of PI-CN.

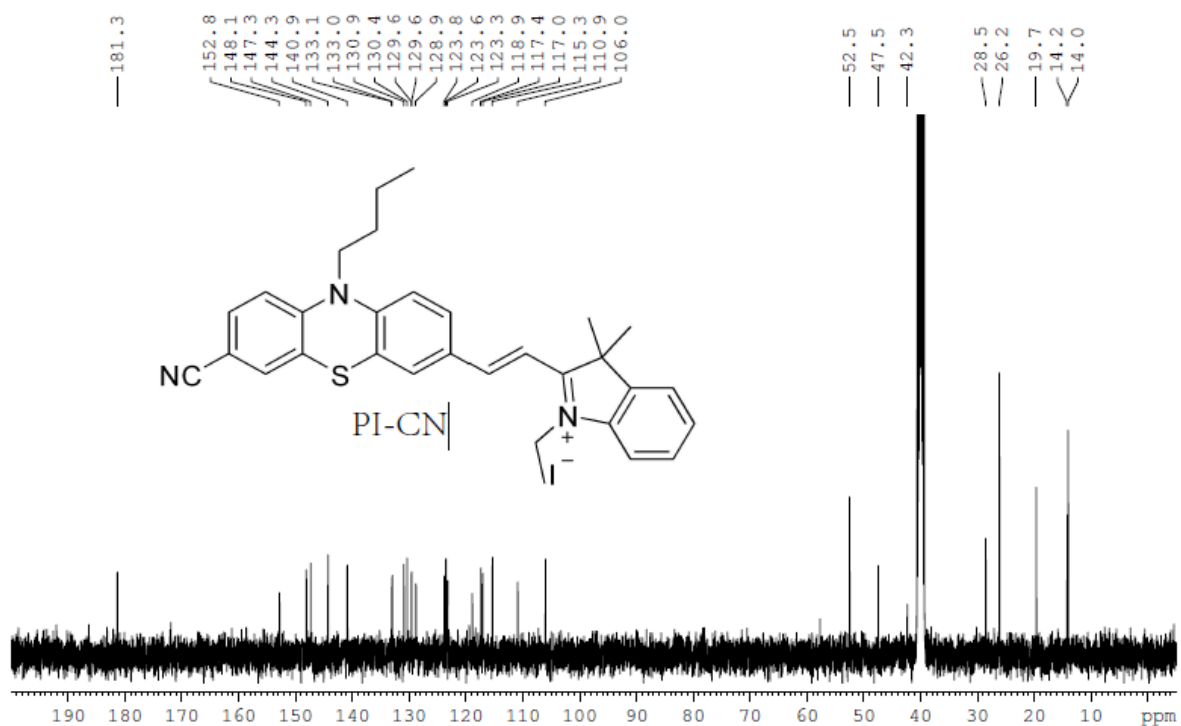

<sup>1</sup>H NMR of PI-Br.

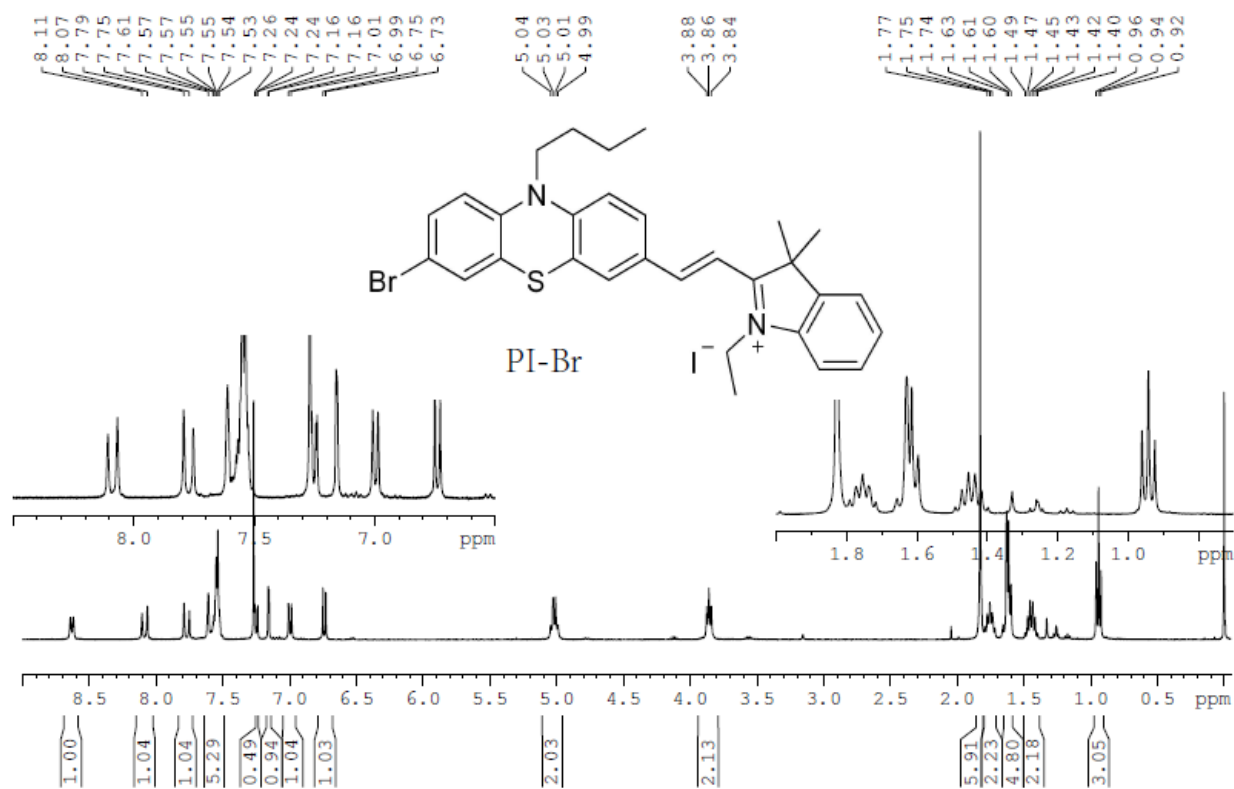

<sup>13</sup>C NMR of PI-Br.

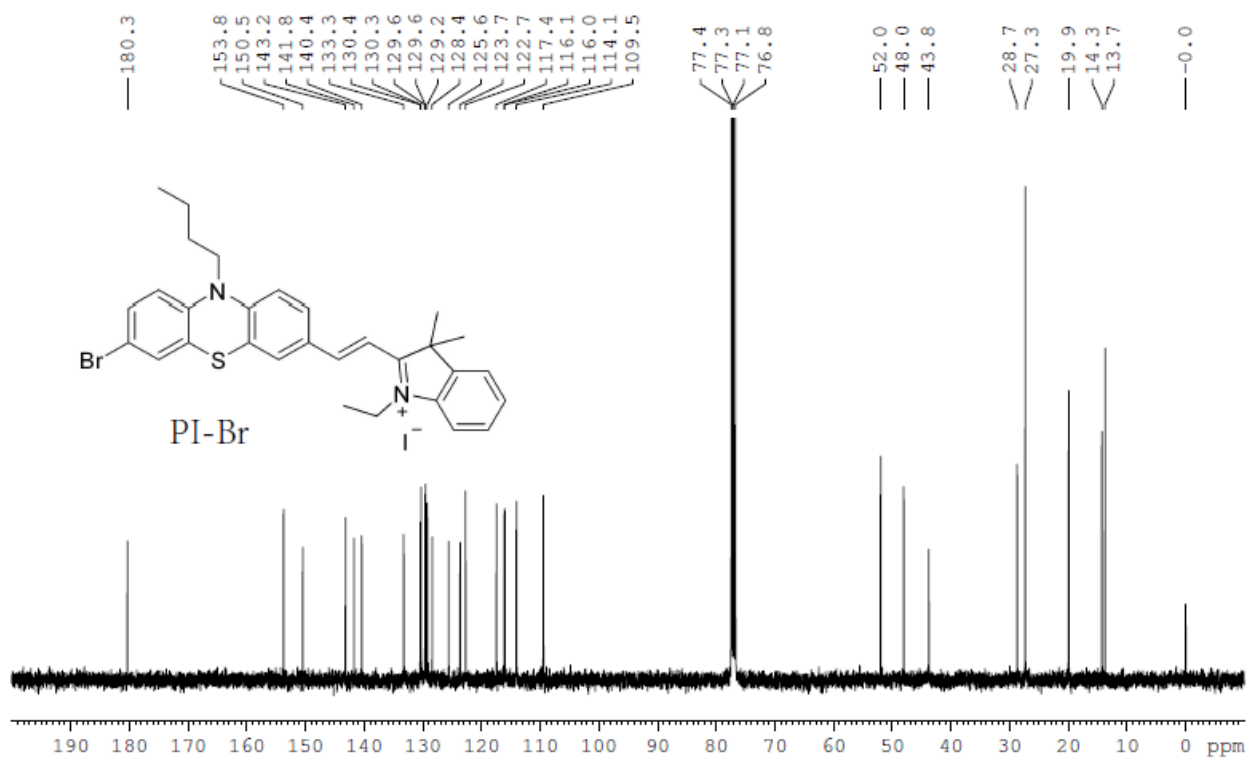



$^1\text{H}$  NMR of PI-OH.

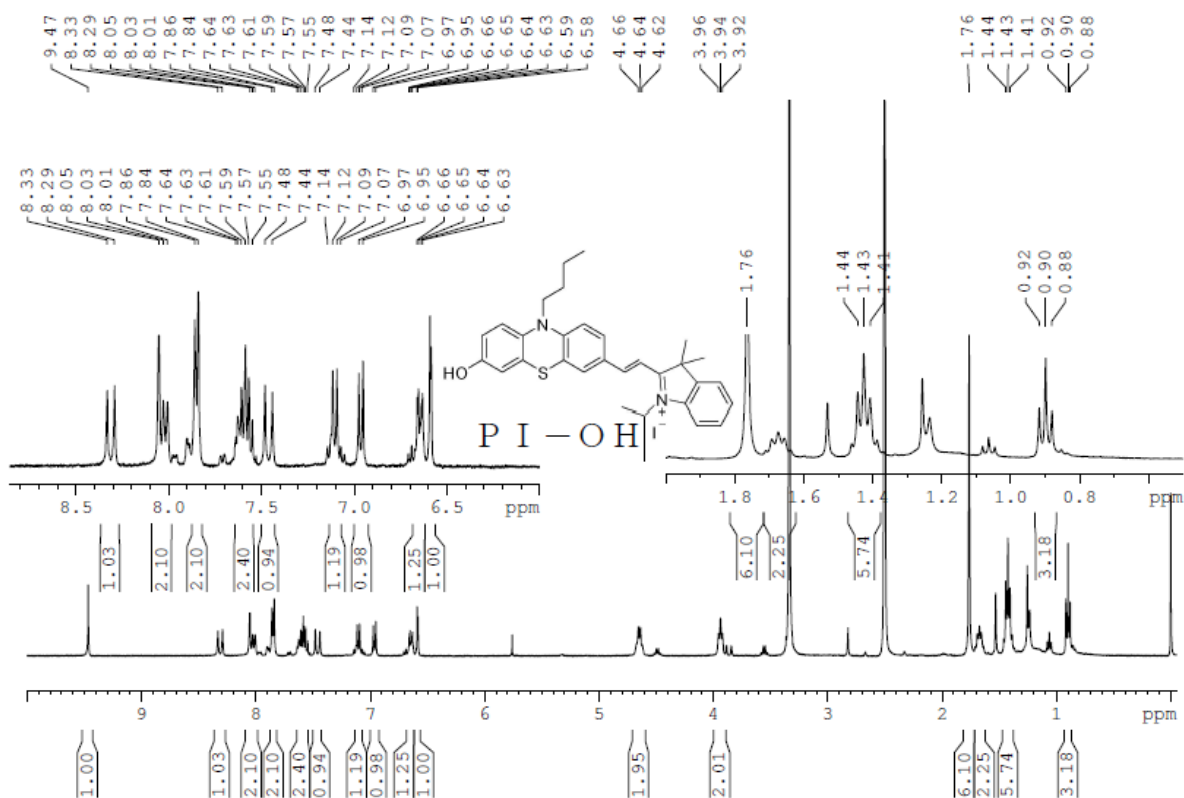

$^{13}\text{C}$  NMR of PI-OH

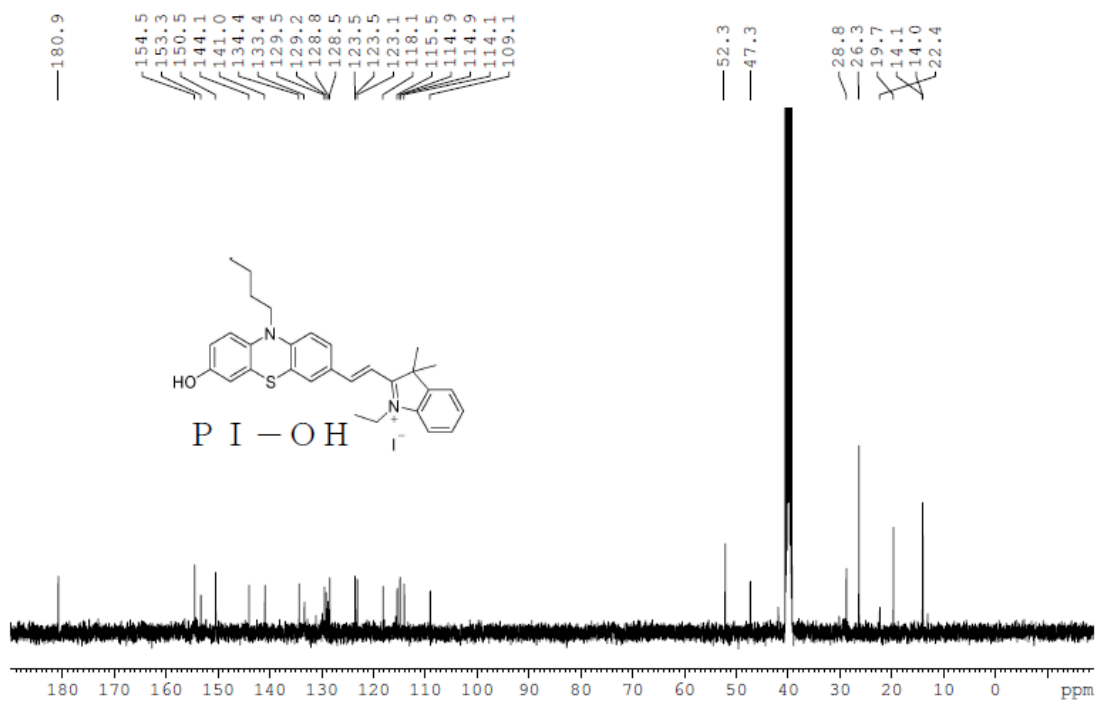

Supplement: d1ra06868g1.pdf [file d1ra06868g1.pdf]
